# Supplementary material for: Diagnostik der Androgenisierung am Beispiel „funktionell androgenisierendes Syndrom III“ (≈„PCOS“)
Source: Springer Nature journal article supplement (doi:10.1007/s00129-019-04522-0), 2019-10-29
Supplement: MOESM1 [file 17336100]

| **Tabelle 1** Variablen für die Abklärung der funktionellen Androgenisierung der Frau: Gesamtübersicht. | | | | | |
| --- | --- | --- | --- | --- | --- |
| **Organ, Organsystem** | **Funktions-Dysfunktionsbereich** | | **Variable (angegeben sind die pathologischen Cut-offs)** | | |
|  |  | | **Methode** | **Cut-off-Wert** | **Einheit** |
| Anthropometrie | Fettgewebe | | Body mass index | ≥25/30/35 | kg/m2 |
| Gewichtsperzentile [49] | >90/>97/>99,5 | %-tile |
| Abdominale Zirkumferenz | ≥87 | cm |
| Haut | Pilosebaköse Einheit | | Akne-Score [39] | ≥I.-III.° | Grad (°) |
| mFGS [15] | ≥4/≥16/≥26-36 | Punkte |
| mSinclair-Scale [11]  Haarausfall/d [22]  Lokalisation [22] | ≥2-5  >100  bitemporal | Grad  Haare/d  - |
| Epidermis | | Pseudocanthosis nigricans, Typ III | Lokalisationen | Nucheal, axillär  perianogenital |
| Hypophyse | Gonadotroph | | LH/FSH-Quotient | >1,3 | - |
| Thyreotroph | | Thyreoidea stimulierendes Hormon | <0.3 > 4 | µU/mL |
| Ovar | Follikel | Theka interna | Testosteron | >2,2<5 | nmol/L |
| Granulosazelle | Antimüllerhormon [28, 35, 51] | >8 | ng/mL |
| Östradiol | <440 | pmol/L |
| Luteinzelle | Progesteron | ≤6 | nmol/L |
| Sonogr. Ovarmorphologie | | EPO1 [22] | s. Fußnote | - |
| Nebennierenrinde | Zona fasciculata | | Testosteron (T) | >2,2<5 | nmol/L |
| DHEAS | > 11<15 | μmol/L |
| T und DHEAS im DXM-ST | s. Tab. 7 | - |
| Zona reticularis | | 17-OHP im ACTH-Test | s. Tab. 6 | - |
| Cortisol  Cortisol im DXM-ST | >690  s. Tab. 7 | nmol/L  - |
| Genom: Mutation/Deletion | | *CYP21A2*  *CYP11*  *3ß-Hydroxysteroiddehydrogenase* | -  -  - | -  -  - |
| Uterus | Endometrium | | Durchmesser [43] | >5 | mm |
| Multiple Organe | Menstruationszyklus | | Intervalllänge [47] | s. [47] | Woche |
| Multiple Organe | Ungew. Kinderlosigkeit | | Zeitspanne | >1 | Jahr |
| Leber | Hepatozyt | | Sex-hormone-binding globulin | <30 | nmol/L |
| Alanin-Aminotransferase | >35 | U/L |
| Leber-Ovar-NNR | vgl. unter Leber/Ovar | | Free androgen index:  FAI=100 x (Testosteron/SHBG) | >7 | - |
| Leber, Fettgewebe | Lipidstoffwechsel | | TG/HDL-C-Quotient [30] | >3 | - |
| Pankreas u.a. | Glukose-/Insulinstoffwechsel | | Glukose | s. Tab. 5 | - |
| Insulin | s. Tab. 5 | - |
| Knochenmark | Erythropoese | | Hämoglobin | <12 | g/dL |
| Zusätzliches | Eisenstoffwechsel | | Eisen  Transferrin  Ferritin | <49  <2,0  <13 | µg/dL  g/L  ng/ml |
| EPO, enlarged polyfollicular ovary: maximaler ovarieller Durchmesser: ≥ 31 mm, Follikelanzahl/max. Ovarebene ≥8 mm und zentrale, echodichte Struktur von >1/3 der maximalen Ovarebene [17, 22, 23].  Abkürzungen: *mFGS* modifizierter Ferriman-Gallwey-Score; *m* modifiziert; *LH* luteinisierendes Hormon; *FSH* Follikel stimulierendes Hormon; *DHEAS* Dehydroepiandrosteron-Sulfat; *DXM-ST* Dexamethason-Suppressionstest; *17-OHP* 17-Hydroxyprogesteron; *ACTH* Adrenocorticotropes Hormon; *Ungew.* ungewollte; *TG/HDL-C* Triglycerid/high density lipoprotein cholesterol. | | | | | |

| **Tabelle 2** Clearing-/Suchebene (CSE): Variablen bei der zu untersuchenden FA-Patientin (Fallbeispiel). | |
| --- | --- |
| **Obligate CSE-Suchparameter** | **Weitere, obligate, charakterisierende Variablen** |
| Body mass index (BMI) | Alter |
| BMI-Perzentile (BMI-P)a  Akne Scoreb | Menstruationszyklus (WHO)  Ungewollte Kinderlosigkeit |
| mFerriman-Gallwey Scoreb | Abdominale Zirkumferenz |
| mSinclair-Scoreb | Sonographische Endometriumdicke |
| Testosteron | Blutdruck |
| Anti-Müller-Hormonc | Prolaktin |
| EPO | Thyreoidea stimulierendes Hormon |
| DHEAS | Cortisol |
| SHBG | Blutbildd, Eisenstoffwechseld |
| Free androgen index | Pseudoacanthosis nigricans, Typ III |
| Alanin-Aminotransferase | **Fakultative, FA-unabhängige Variablen** |
|  |
|  | Desiderium contraceptionem |
|  | Gerinnungsstatus (Risikopatientin) |
| a≤18. LJ wird die BMI-P (BMI-Perzentile) bevorzugt.  bBei kutaner Androgenisierung.  cBei sonographischem Nachweis eines EPO, bei kleinen oligofollikulären Ovarien [23, 26, 42] oder wenn eine sonographische Untersuchung nicht möglich ist (z. B. in der Adoleszenz).  dBei Female pattern hair loss.  Abkürzungen: *CSE* Clearing-/Suchebene; *FA* funktionelle Androgenisierung; *EPO* enlarged polyfollicular ovary; *DHEAS* Dehydroepiandrosteron-Sulfat; *SHBG* sex hormone-binding globulin. | |

**Tabelle 3** Differentialdiagnose zum Funktionell Androgenisierenden Syndrom III, Ausschlüsse1.

| **Themenbereiche** | **Medikamente, Formen, Symptome** |
| --- | --- |
| Androgenisierende Medikamente | Progestagene mit partieller Androgenwirkung (17α-Hydroxyprogesteron-, 19-Nortestosteron-Derivate), auch in Kontrazeptiva |
| Androgen replacement therapy (z. B. DHEA) |
| Anabolika (z. B. Testosteron, Stanozolol, Somatomedine) |
| Schilddrüsenhormone |
| Glukokortikoide |
| Antiepileptika |
| Nicht-endokrine Androgenisierungserscheinungen | Hypertrichiose (z. B. bei mediterraner Ethnie) |
| Vellushaarbildung (z. B. Anorexia nervosa) |
| Effluvium postpartalis |
| Virilisierung | Rasche Progredienz der Symptome: z. B.: |
| Hirsutismus II-III° |
| Female pattern hair loss II-III° |
| Tiefertreten der Stimme (Stimmmuskelhypertrophie) |
| Muskelzuwachs |
| Mammatrophie |
| Klitorishypertrophie |
| Androgenwerte (T, DHEAS) im Tumorbereich | Vergrößerte fibrosierte Ovarien: Hyperthecosis ovarii |
| Ovarielle oder adrenale C19-Sexualsteroid produzierende Tumoren (z. B. Leydigzelltumor, Keimzelltumor; adrenocorticales Carcinom) |
| Paraneoplastisches Syndrom (z. B ACTH-produzierend mit Cushing-Snydrom) |
| Multiple endokrine Neoplasien (z. B. mit adrenocorticalem Carcinom) |
| Alopezie | Alopezie bei Eisenmangelanämie |
| Frontal fibrosierende Alopezie |
| Akne | Akne inversa, venenata, cosmetica |
| Pädiatrisch-endokrine Differentialdoagnose (DD) | Adrenogenitales Syndrom (AGS) |
| Late-onset AGS |
| Adipositassyndrome |
| Prader-Labhardt-Willi |
| Alström |
| Cohen |
| Carpenter |
| Zystische Fibrose |
| Internistisch-endokrine DD | Hypo-Hyperthyreose |
| M. Cushing, Cushing-Syndrom |
| Akromegalie |
| M. Addison |
| Weitere internistische DD | Polyglanduläres Autoimmunsyndrom |
| Sjögren-Syndrom |
| Phäochromozytom |
| Sexuelle Orientierung, Geschlechtsidentität | Partial androgen insensitivity syndrome |
| Personen aus der LGBTQ community |

1Modifiziert nach Geisthövel et al, 2010 [22]

Abkürzungen: *DHEA* Dehydroepiandrosteron; *T* Testosteron; *DHEAS* DHEA-Sulfat; *ACTH* Adrenocorticotropes Hormon; *LGBTQ* lesbian, gay, bisexual, transgender, queer.

| **Untersuchungsbedingung/-art** | **Funktion/Hinweise** |
| --- | --- |
| 3.-5. Zyklustag | Reduzierung zirkazyklischer Fluktuationen |
| 12h-Nüchternphase | Voraussetzung für die Bestimmung der Lipide und für die Durchführung des oGTT (Tab. 5) |
| Blutentnahme (BE)-Start (mit heparinisiertem i. v. Verweilzugang) zwischen 08:00 – 09:00 | Reduzierung zirkadianer Fluktuationen für Hormone, die z.B. einen zirkulatorischen Morgenpeak aufweisen wie Cortisol |
| Bestimmung von Luteinisierendem Hormon, Follikel-stimulierendem Hormon, Östradiol und Progesteron | Beleg für einen funktionellen Status entsprechend der frühen Follikelphase (z.B. bei Oligo-Amenorrhoe);  Beachtung zirkazyklischer Fluktuationen |
| Basale BE (0-Wert) aus einer Poolprobe aus dreimal in 20 min-Abständen hintereinander abgenommenen Einzelproben | Reduzierung zirkoraler Fluktuationen des 0-Werts, der eine Nüchtern-Basis-Bestimmung der entsprechenden klassifizierenden, charakterisierenden und unabhängigen Variablen (Tab. 2, Tab. 8) darstellt. |
| Direkt nach Abnahme der letzten 0-Poolprobe: orale Einnahme von 75 g Glukose (Dextrose-O.G.-T. Saft), 60 min bzw. 120 min später weitere BE; Bestimmung von Insulin bzw. Glukose | oGTT: Normwert, gestörte Nüchternglukose, gestörte Glukosetoleranz, Hyperinsulinämie, Typ-2-Diabetes mellitus (Tab. 5) |
| Direkt nach der letzten BE des oGTT: Injektion von ACTH-24 und weitere BE nach 60 min | ACTH-Test (Tab. 6): Erfassung einer aktiven adrenalen Beteiligung |
| Modifizierter DXM-ST (s. Tab. 7): orale Einnahme von 4 x 0,5 mg DXM abends 22:00 Uhr über 4 Tage, am 5. Tag zwischen 8:00 - 9:00 Uhr BE mit Bestimmung von T, DHEAS und Cortisol | Differenzierung zwischen ovarieller und adrenaler Hyperandrogenämie (HA); eine vollständige Suppression spiegelt eine adrenale Genese der HA wider. |
| Jede(s) Praxis/Institut bzw. entsprechende Kooperationen sollte(n) eigene, kontrollierte Richtwerte festlegen. | Vermeidung inter-institutioneller Normwert-Schwankungen, z. B. bei der Bestimmung von Testosteron und Insulin |
| Bei Hormoneinnahme insbesondere unter endokriner Kontrazeption | Eine Untersuchung ist wegen der hypophysär-ovariellen Suppression unter einer solchen Therapie nur bei bestimmten Fragestellungen sinnvoll. |

**Tabelle 4** Methodik der Klassifikationsebene.

Abkürzungen: *oGTT* oraler Glukosetoleranztest; *ACTH* Adrenocorticotropes Hormon; *DXM-ST* Dexamethason-Suppressionstest; *T* Testosteron; *DHEAS* Dehydroepiandrosteron-Sulfat.

| **Tabelle 5** Oraler Glukosetoleranztest (oGTT) auf Klassifikationsebene: Bewertung, Schweregrad, individuelle Indikation. | | | | | | |
| --- | --- | --- | --- | --- | --- | --- |
|  | | **oGTT** | | | | |
|  | Glukose [3] | | | Insulin [22, 38] | | |
| Zeiten (min) | Wert (mg/dL) | | Bewertung | Wert (mU/mL) | Bewertung |
| 0 | ≥100-125 | | gestörte Nüchternglukose (gNG) |
| ≥126 | | Typ 2 Diabetes mellitus (T2DM) |
| 60 | - | | - | ≥ 100 | 1h (pp) HI |
| 120 | ≥140-199 | | gestörte Glukosetoleranz (gGT) | - | - |
| ≥200 | | T2DM |
| **Zunehmender Schweregrad der Glukose/Insulin-Stoffwechselstörung [41]** | | | | | |
| ppHI  gGT  gNG T2DM mit HI T2DM mit niedrigem Insulin (≈pankreatische Erschöpfung) | | | | | |
| Abkürzungen: *ppHI* postprandiale Hyperinsulinämie | | | | | |

| **Tabelle 6** Adrenocorticotropes Hormon (ACTH)-Test [34]. | | |
| --- | --- | --- |
| **Prüfdefinition** | **17-0HP**  **(ng/mL)** | **CYP21A2-Akivitätsminderung:**  **Wahrscheinlicher Phänotyp1** |
| 0-Wert | ≤2,6  >2,6 | keine  mittelschwer |
| >10 | schwer: CAH |
| Δ: 60 min-Wert – 0-Wert  60 min-Wert | >2.5  >10 | leicht: FAS II  mittelschwer-schwer: NC-CAH |
| 1Eine eindeutige Genotyp-Enzymaktivität-Phänotyp-Zuordnung ist nicht möglich [10].  Abkürzungen: *17-0HP* 17-Hydroxyprogesteron; *Δ* Differenz zwischen Basis- und ACTH-stimuliertem Wert nach i. v. Bolusgabe von 250 μg/1 mL von synthetischem ACTH-24 (Tetracosactid; Synacthen®); *CAH* congenital adrenal hyperplasia; *FAS* Funktionell androgenisierendes Syndrom; *NC-* non classical-. | | |

| **Tabelle 7** Dexamethason-Suppressionstest (DXM-ST). | | |
| --- | --- | --- |
| **Hormon** | **Suppressionswert,**  **Deltawert (**Δ**)** | **Bewertung** |
| Dehydroepiandrosteron-Sulfat  (μmol/L) | < 1 [1] | adrenalektomierter Bereich ≈ komplette Suppression 🡪Tumorausschluss |
| Testosteron (T)  (nmol/L) | >1,4; Δ <0,9 | T-Suppression ungenügend; T🡩 ovariellen Ursprungs |
| <1,4 [1] | T🡩 adrenalen Ursprungs |
| Cortisol  (nmol/L) | <80 [34] | Komplette Suppression ≈ Nachweis einer adäquaten DXM-Einnahme |
| Abkürzungen: *Δ* Differenz zwischen dem T-Wert vor der DXM-Gabe (Prä-DXM-Wert) und dem Post-DXM-Wert (der ΔT-Wert sollte <0.9 nmol/L sein und damit eine gute Suppression der adrenalen T-Sekretion anzeigen). | | |

| **Tabelle 8** Klassifikationsebene: gemessene Variablen am Fallbeispiel einer Patientin, die nach Erhalt aller Werte als FAS III-a-Patientin eingruppiert wird. | | | |
| --- | --- | --- | --- |
| **Obligate, klassifizierende Variablena** | | **Obligate, charakterisierende Variablena** | |
| **Variable** | **Wert** | **Variable** | **Wert** |
| BMI (kg/m2) | 34,4 | Alter (Jahr) | 19 |
| LH/FSH Quotient | 2,4 | Abdominale Zirkumferenz (cm) | 102 |
| Testosteron (T) (nmol/L) | 2,7 | Aknescore (Schwergrad) | 0 |
| Anti-Müller-Hormon (ng/mL) | 14 | Sinclairscale (Schweregrad) | II-III° |
| Enlarged polyfollicular ovary | + | Haarverlust/d [22] | >100 |
| DHEAS (μmol/L) | 6,4 | Lokalisation [22] | bitemporaler Haarverlust |
| SHBG (nmol/L) | 21 | Feriman-Gallwey Score (Punkte) | 16 |
| Free androgen index | 12,8 | Pseudocanthosis nigricans Typ III | nucheal, axillär, perianogenital |
| oGTT |  | Endometrium (mm) | 6 (homogen) |
| Glucose 0/120 (mg/dL) | 98/156 | Blutdruck (mmHg) | 90/140 |
| Insulin 0/60 (mU7mL) | 22/216 | TG/HDL-C | 4,5 |
| ACTH-Test |  | Alanin-Aminotransferase (U/L) | 47 |
| 17-0HP 0/60 (ng/mL) | 1,9/1,8/3,7 | Zyklus (Woche) | 7-9 |
| mDXM-ST |  | Ungewollte Kinderlosigkeit | - |
| T (nmol/L) | 2.1 | Östradiol (pmol/L) | 75 |
| ΔT | 0.6 | Progesteron (nmol/L) | 5,7 |
| Cortisol (nmol/L) | <80 | Eisenstoffwechsel | unauffällig |
| Genmutation, -deletion | - | **Fakultative, FA-unabhängige Variablen** | |
|  |  | Gerinnungsstatus | normal |
|  |  | Desiderium contraceptionem | + |
| aAlle pathologischen Serumwerte auf der Clearing-/Such-Ebene (CSE) werden auf der methodisch hochstehenden Klassifikationsebene nochmals neu erfasst, die übrigen Variablen können von der CSE übernommen werden.  Abkürzungen (alle Angaben in „Rot“ zeigen Pathologien auf): *LH* luteinisierendes Hormon; *FSH* Follikel-stimulierendes Hormon; *DHEAS* Dehydropiandrosteron-Sulfat; *oGTT* oraler Glukosetoleranztest; *ACTH* Adrenocorticotropes Hormon; *17-OHP* 17-Hydroxyprogesteron; *mDXM-ST* modifizierter Dexamethason-Suppressionstest; *ΔT* Differenz, T prä – T post DXM; *TG* Triglycerid; *HDL-C* high density lipoprotein cholesterol. | | | |

**Tab 9.** Befunde, die bei einer FAS III-Patientin zu der Einteilung in die Untergruppe „b“ führt (22, Abb. 1)

| Mindeststandards | | Nicht erklärbares Fehlen des ↑ oder ↓ eines klassischen  Parameters | Ovariell-adrenale Mischform (7,22) |
| --- | --- | --- | --- |
| absolut | entweder/odera |
| Testosteron | BMI erhöht („Birnenform“):  „obese, non-metabolic (6) | - LH/FSH↑ | FAS III-a + DHEAS↑b |
| EPO | gestörter Glukose-/Insulinmetabolismus:  „metabolically obese, but normally weight  (13, 46)c | - AMH↑ |
| - SHBG↓ |
| - FAI↑ |

aWährend bei der Untergruppe FAS III-a BMI erhöht und gestörter Metabolismus gleichzeitig bestehen muss, braucht bei der Untergruppe „b“ nur eins von beiden Variablen präsent zu sein.

bJe nach den Ergebnissen der adrenalen Testverfahren oder auch bei Kinderwunsch sollte evt. eine Genmutations-/deletionsanalyse angeschlossen werden. Eine mäßige Beteiligung der adrenalen Komponente würde der ausgeprägten Störform FAS III untergeordnet: somit FAS III-b.

cMeist handelt es sich um junge Frauen, die sich kalorisch ausgeglichen, aber hyperglykämisch (z. B. eine Tafel Schokolade/Tag) ernähren.

Abkürzungen: *EPO* enlarged polyfollicular ovary; *BMI* body mass index; *-* Minus ≈ Fehlen des Parameters; + Plus ≈ zusätzlich; *LH* luteinisierendes Hormon; *FSH* Follikel-stimulierendes Hormon; *AMH* Anti-Müller-Hormon; *SHBG* sex hormone-binding protein; *FAI* free androgen index.
